# Supplementary material
Source: MDPI journal article supplement (https://www.mdpi.com/1424-8247/13/11/345)

**a**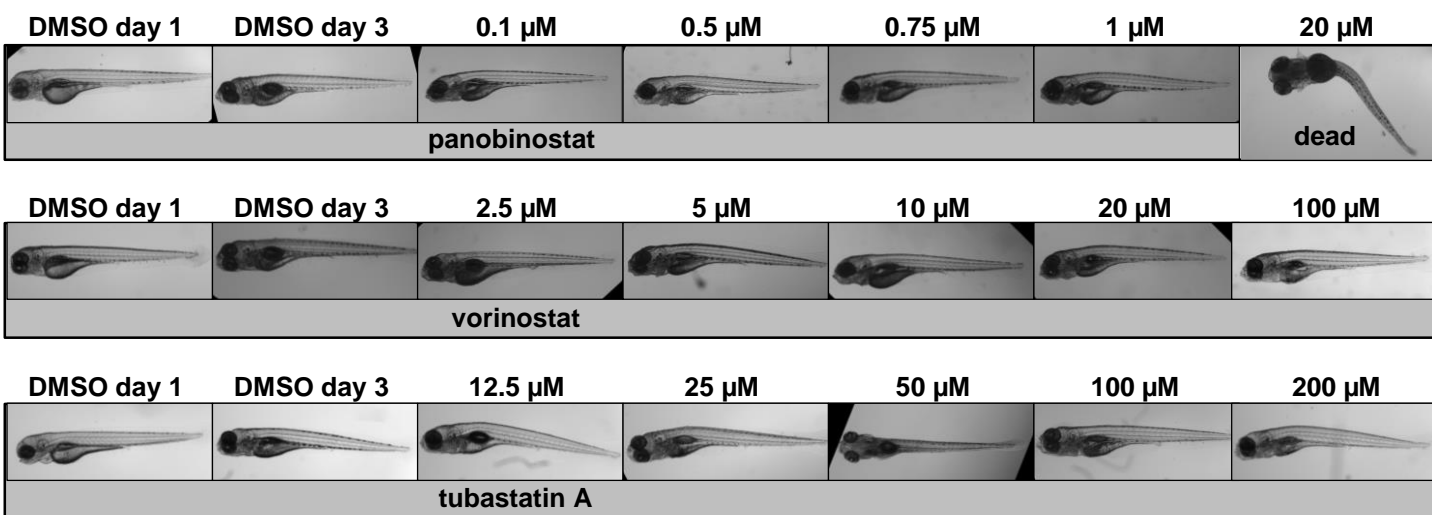**b**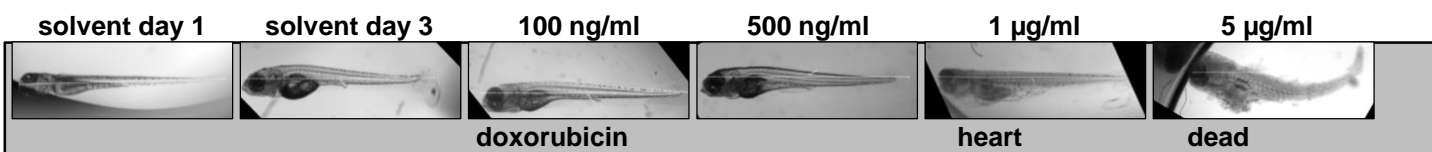

Supplement: s1 [file s1]

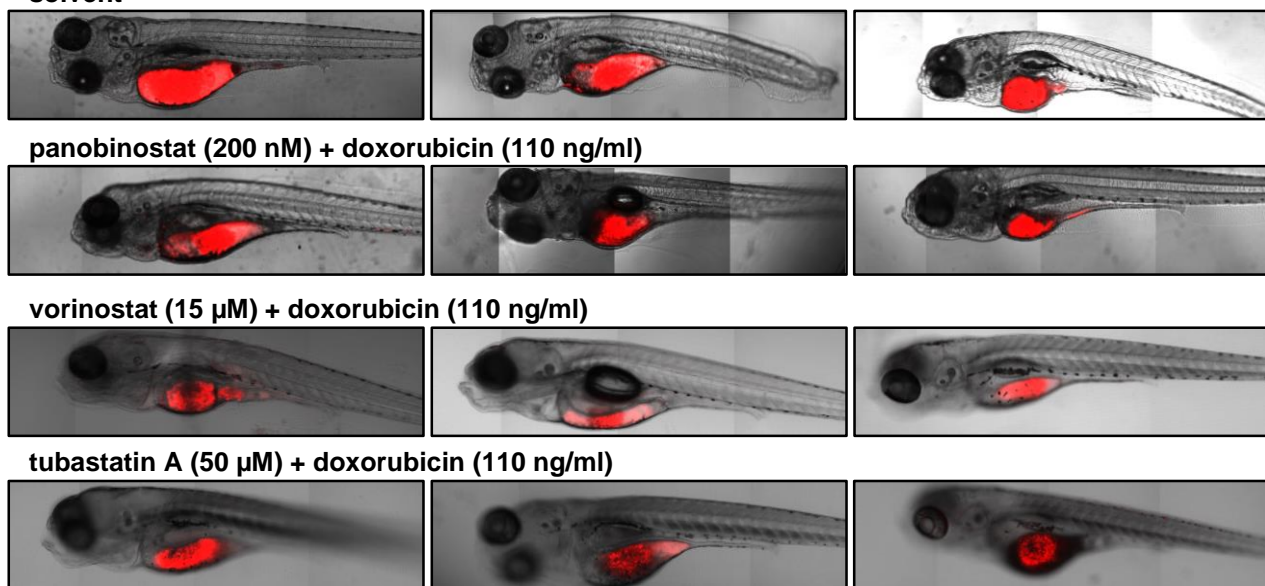

**b**

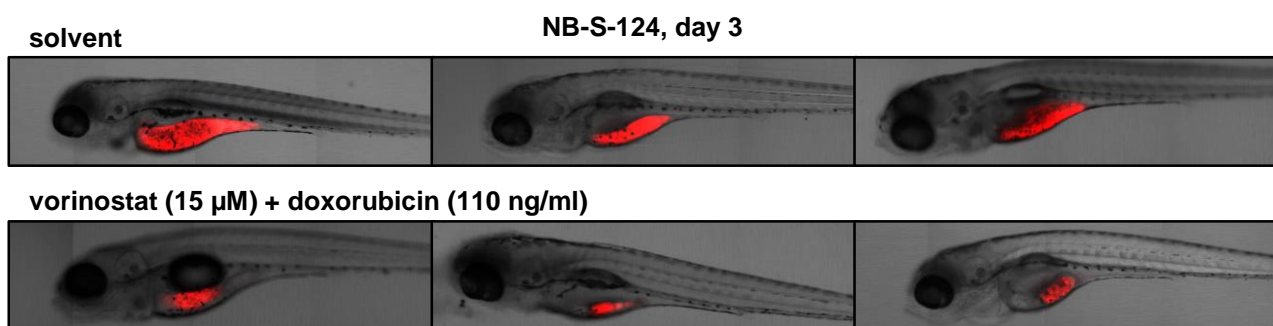

**c**

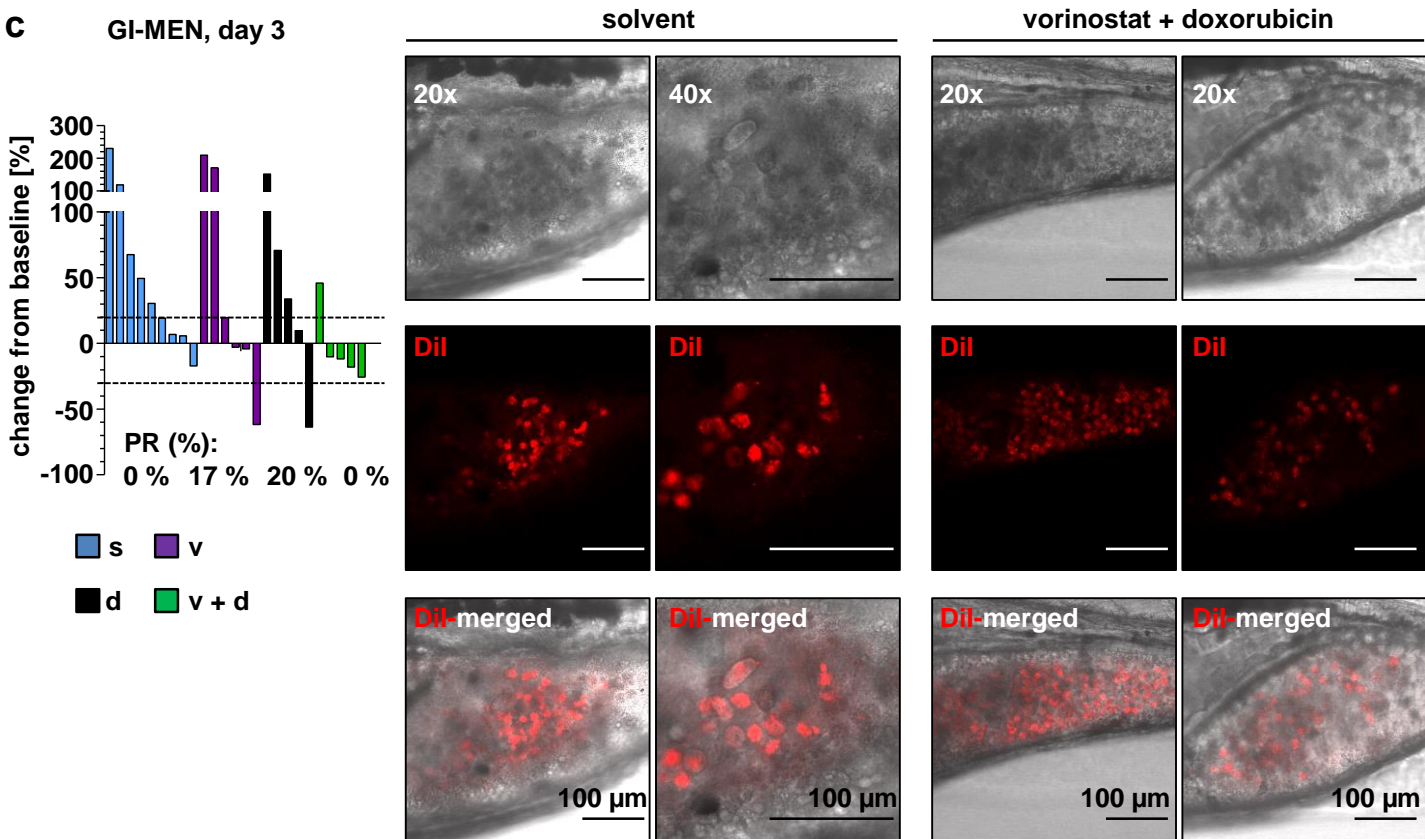

Supplement: s1 [file s1]

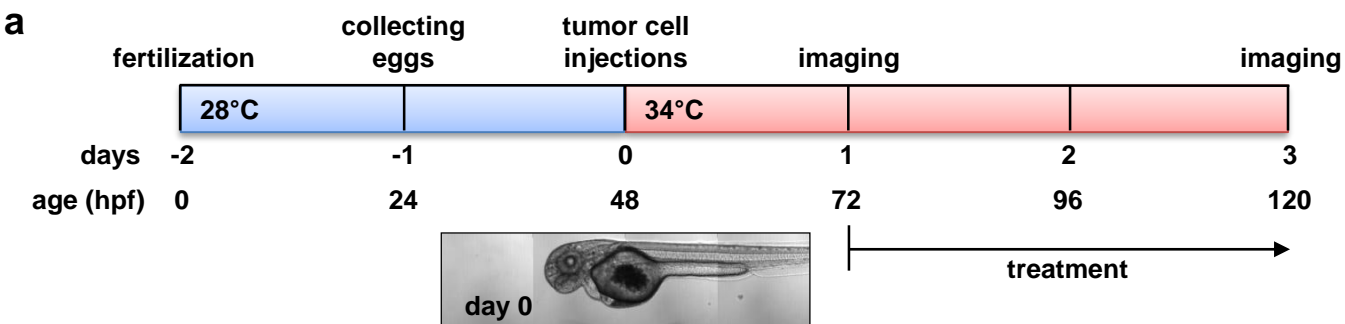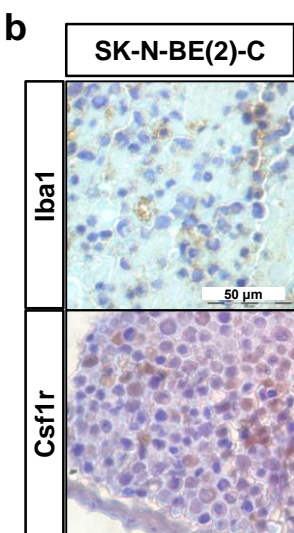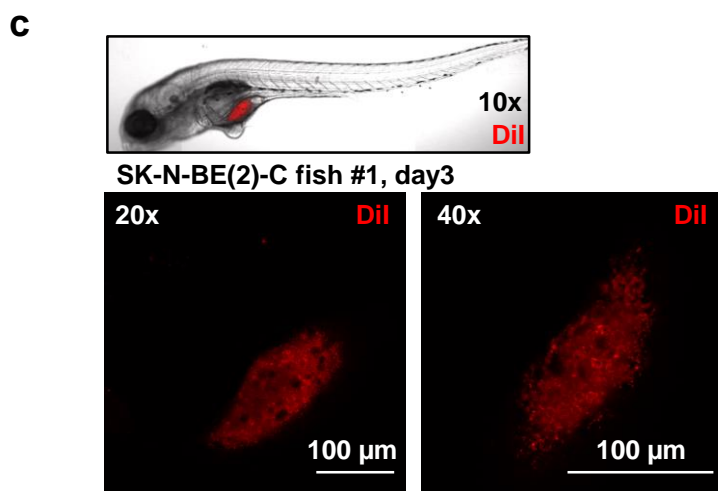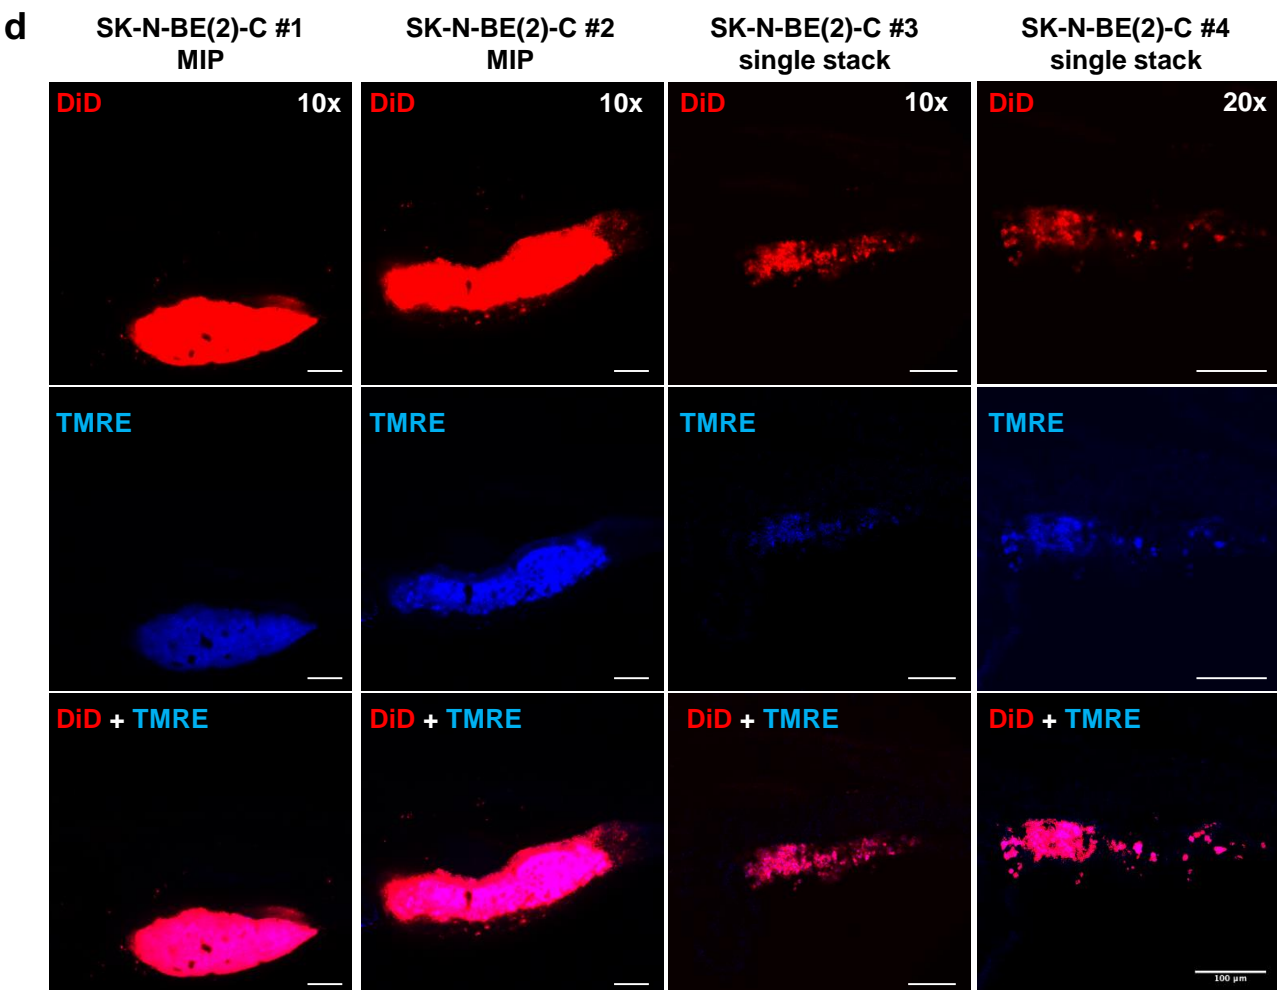

Suppl.  
Fig. 1

Supplement: s1 [file s1]
